# Supplementary material
Source: HighWire-hosted journal article supplement (https://cmaj.ca/highwire/filestream/58892/field_highwire_adjunct_files/2/pressure-lv-3-at.pdf)

**Appendix 3 (as supplied by the authors): Begg's funnel plot for the assessment of publication bias in studies examining the effect of intensive blood pressure lowering on kidney failure**

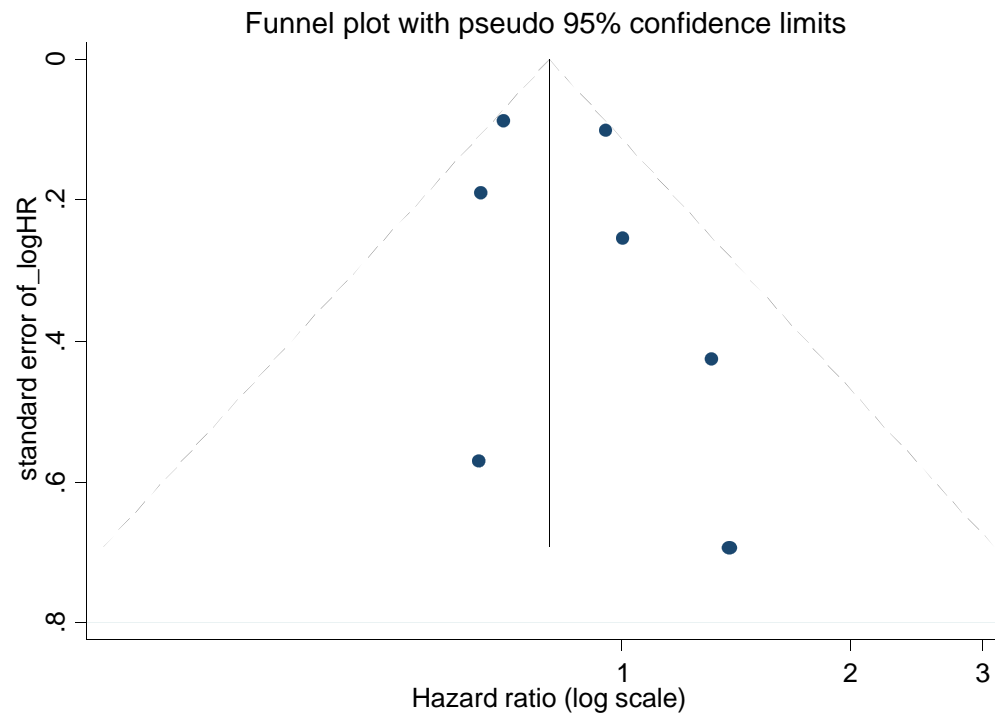

Supplement: pressure-lv-3-at.pdf [file pressure-lv-3-at.pdf]
